# Supplementary material for: Comprehensive Model for the Synthesis of γ-Al2O3 Microsphere-Supported Bimetallic Iron- and Copper Oxide Materials
Source: PubMed Central journal article supplement — ACS Omega. 2022 Oct 31;7(45):41796–803. doi: 10.1021/acsomega.2c06273 (PMC9670694; doi:10.1021/acsomega.2c06273), 2022-10-31
Supplement: ao2c06273_si_001.pdf [file ao2c06273_si_001.pdf]

# A comprehensive model for the synthesis of $\gamma$ - $\text{Al}_2\text{O}_3$ microsphere supported bimetallic iron- and copper oxide materials

*Bram Seynnaeve<sup>1</sup>\*, Jeroen Lauwaert<sup>1</sup>, Pascal Van Der Voort<sup>2</sup>, An Verberckmoes<sup>1</sup>*

<sup>1</sup>Industrial Catalysis and Adsorption Technology, Department of Materials Textiles and  
Chemical Engineering, Ghent University, Valentin Vaerwyckweg 1, 9000 Ghent, Belgium

<sup>2</sup>Center for Ordered Materials, Organometallics and Catalysis, Department of Chemistry,  
Ghent University, Krijgslaan 281, 9000 Ghent, Belgium

\*Address correspondence to Seynnaeve Bram, [Bram.Seynnaeve@Ugent.be](mailto:Bram.Seynnaeve@Ugent.be)

## Supporting Information

Table SI-1: Iron and copper loadings of each material, as experimentally determined with ICP-OES.

|                                                                          | <i>Fe</i><br>(wt%) | <i>Cu</i><br>(wt%) |
|--------------------------------------------------------------------------|--------------------|--------------------|
| <i>Sim_Fe(NO<sub>3</sub>)<sub>3</sub>_Cu(NO<sub>3</sub>)<sub>2</sub></i> | 3.94               | 3.98               |

|                                                                                          |      |      |
|------------------------------------------------------------------------------------------|------|------|
| <i>Seq_Fe(NO<sub>3</sub>)<sub>3</sub>_Cu(NO<sub>3</sub>)<sub>2</sub></i>                 | 4.12 | 4.60 |
| <i>Seq_Cu(NO<sub>3</sub>)<sub>2</sub>_Fe(NO<sub>3</sub>)<sub>3</sub></i>                 | 4.15 | 4.24 |
| <i>Sim_FeCl<sub>3</sub>_Cu(NO<sub>3</sub>)<sub>2</sub></i>                               | 4.16 | 4.22 |
| <i>Seq_FeCl<sub>3</sub>_Cu(NO<sub>3</sub>)<sub>2</sub></i>                               | 4.48 | 4.47 |
| <i>Seq_Cu(NO<sub>3</sub>)<sub>2</sub>_FeCl<sub>3</sub></i>                               | 4.13 | 4.12 |
| <i>Sim_FeCitrate_Cu(NO<sub>3</sub>)<sub>2</sub></i>                                      | 4.11 | 4.42 |
| <i>Seq_FeCitrate_Cu(NO<sub>3</sub>)<sub>2</sub></i>                                      | 3.60 | 7.15 |
| <i>Seq_Cu(NO<sub>3</sub>)<sub>2</sub>_FeCitrate</i>                                      | 3.00 | 4.50 |
| <i>Sim_Fe(NO<sub>3</sub>)<sub>3</sub>+HNO<sub>3</sub>_Cu(NO<sub>3</sub>)<sub>2</sub></i> | 4.53 | 4.63 |
| <i>Seq_Fe(NO<sub>3</sub>)<sub>3</sub>+HNO<sub>3</sub>_Cu(NO<sub>3</sub>)<sub>2</sub></i> | 4.30 | 4.73 |
| <i>Seq_Cu(NO<sub>3</sub>)<sub>2</sub>_Fe(NO<sub>3</sub>)<sub>3</sub>+HNO<sub>3</sub></i> | 3.80 | 3.76 |
| <i>Sim_FeCl<sub>3</sub>+HCl_Cu(NO<sub>3</sub>)<sub>2</sub></i>                           | 4.51 | 4.45 |
| <i>Seq_FeCl<sub>3</sub>+HCl_Cu(NO<sub>3</sub>)<sub>2</sub></i>                           | 6.12 | 4.81 |
| <i>Seq_Cu(NO<sub>3</sub>)<sub>2</sub>_FeCl<sub>3</sub>+HCl</i>                           | 4.96 | 3.40 |
| <i>Seq_HCl-pretreatment+FeCl<sub>3</sub>_Cu(NO<sub>3</sub>)<sub>2</sub></i>              | 4.63 | 4.14 |
| <i>Seq_Cu(NO<sub>3</sub>)<sub>2</sub>_HCl-pretreatment+FeCl<sub>3</sub></i>              | 4.58 | 4.63 |

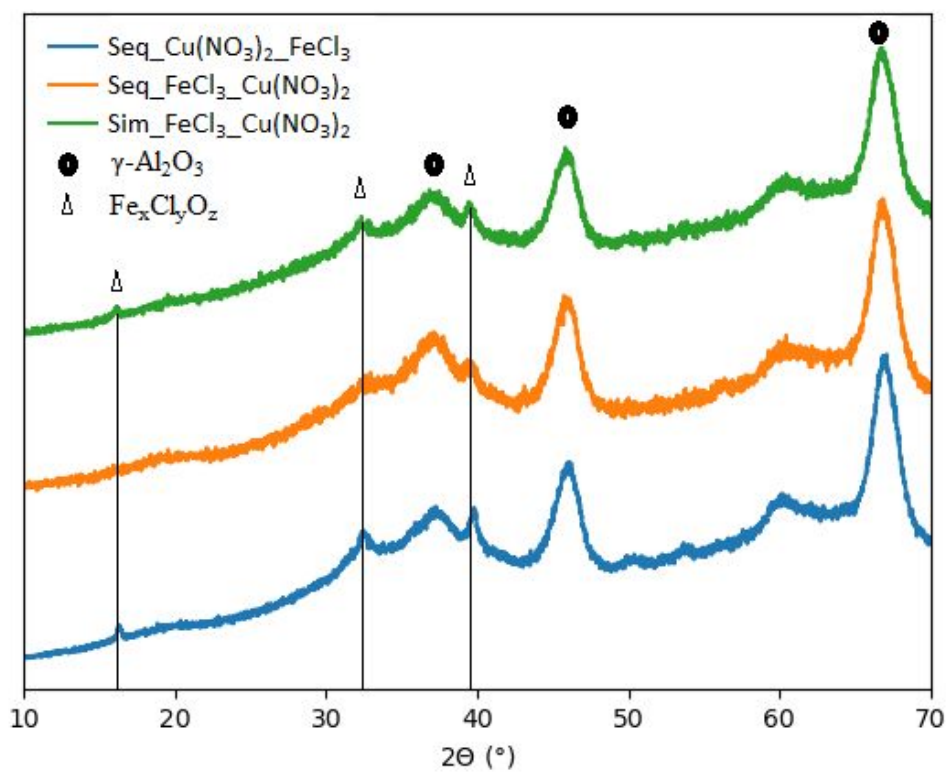

Figure SI-1: PXRD patterns of the bimetallic materials synthesized with FeCl<sub>3</sub> as iron source, with the diffractions of  $\gamma$ -Al<sub>2</sub>O<sub>3</sub> and the unknown Fe-O-Cl compound marked

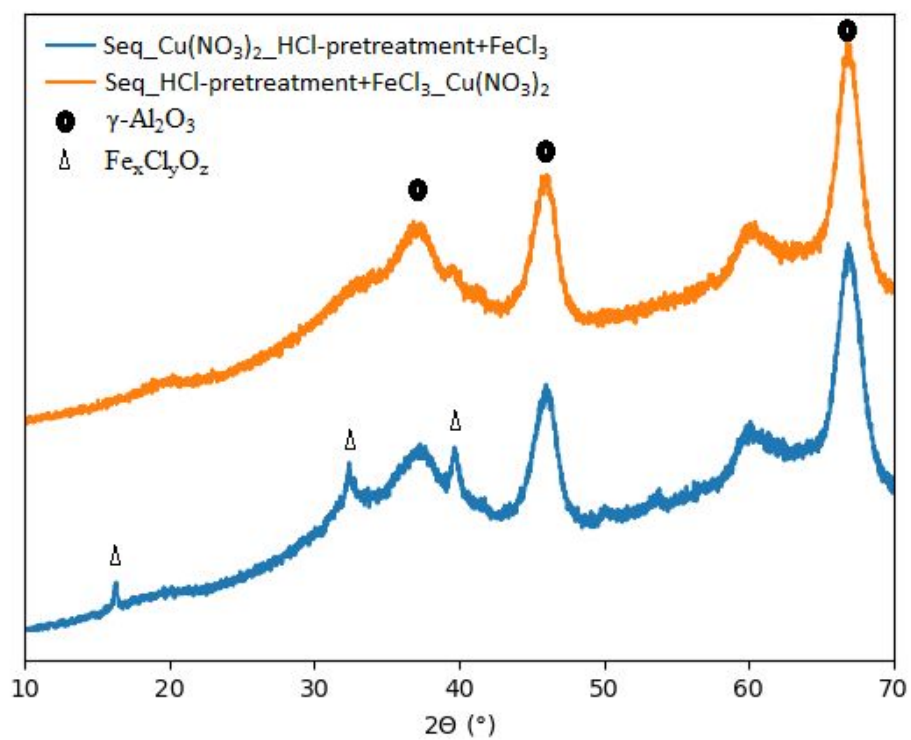

Figure SI-2: PXRD patterns of the bimetallic materials synthesized where HCl pretreatment was used, with the diffractions of  $\gamma$ -Al<sub>2</sub>O<sub>3</sub> and the unknown Al-O-Cl compound marked

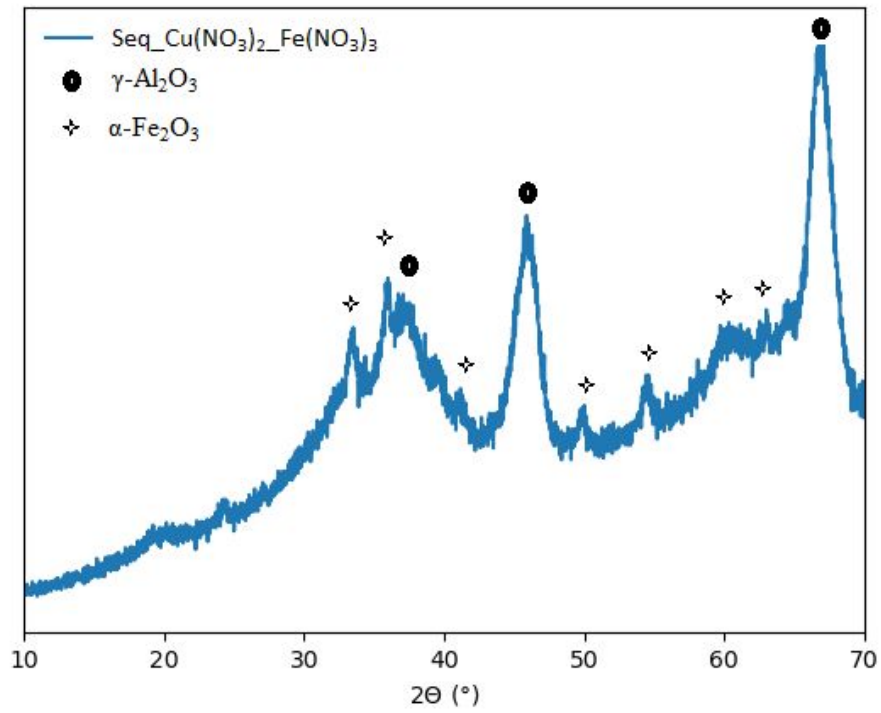

Figure SI-3: PXRD pattern of the seq\_CuNO3\_FeNO3 bimetallic material, with the diffractions of  $\gamma\text{-Al}_2\text{O}_3$  and  $\alpha\text{-Fe}_2\text{O}_3$  marked

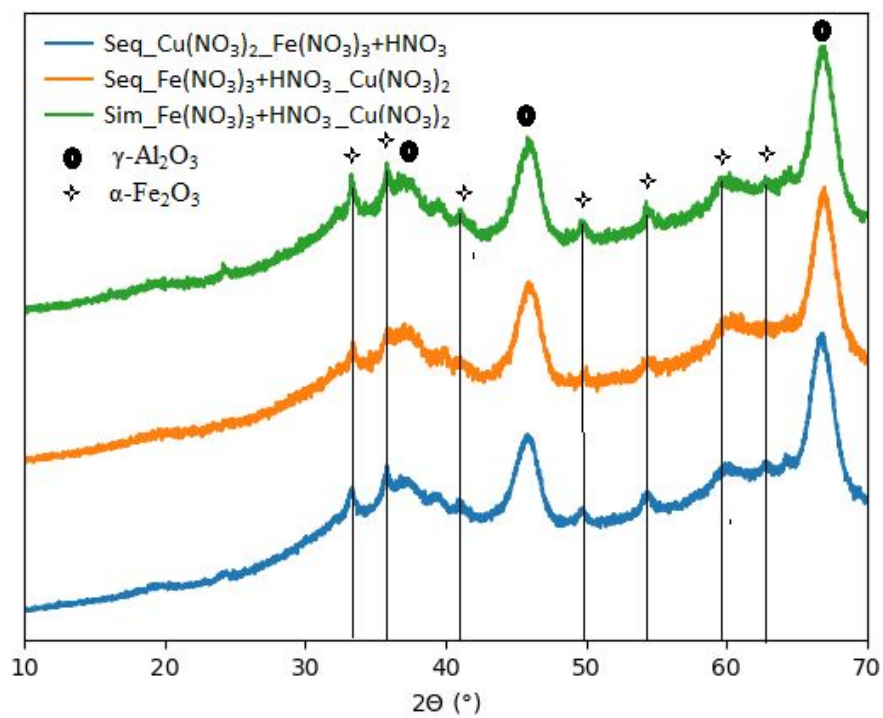

Figure SI-4: PXRD patterns of the bimetallic materials synthesized with Fe(NO<sub>3</sub>)<sub>3</sub>, acidified with HNO<sub>3</sub>, as iron source, with the diffractions of  $\gamma$ -Al<sub>2</sub>O<sub>3</sub> and  $\alpha$ -Fe<sub>2</sub>O<sub>3</sub> marked

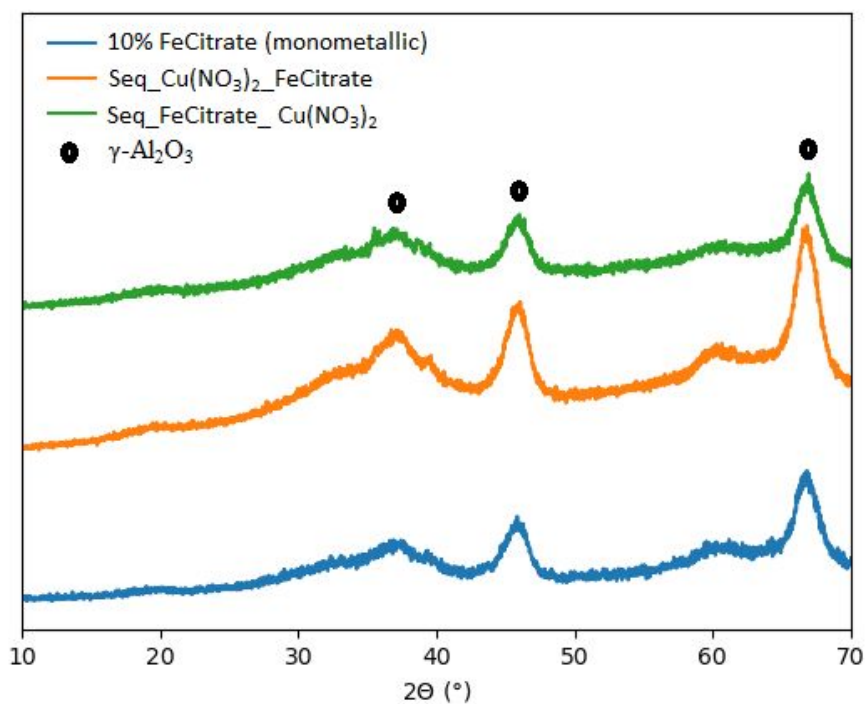

Figure SI-5: PXRD patterns of the bimetallic materials synthesized with ferric ammonium citrate as iron source, with a monometallic 10% iron oxide@Al<sub>2</sub>O<sub>3</sub> made using ferric ammonium citrate as reference. The diffractions of  $\gamma$ -Al<sub>2</sub>O<sub>3</sub> are marked

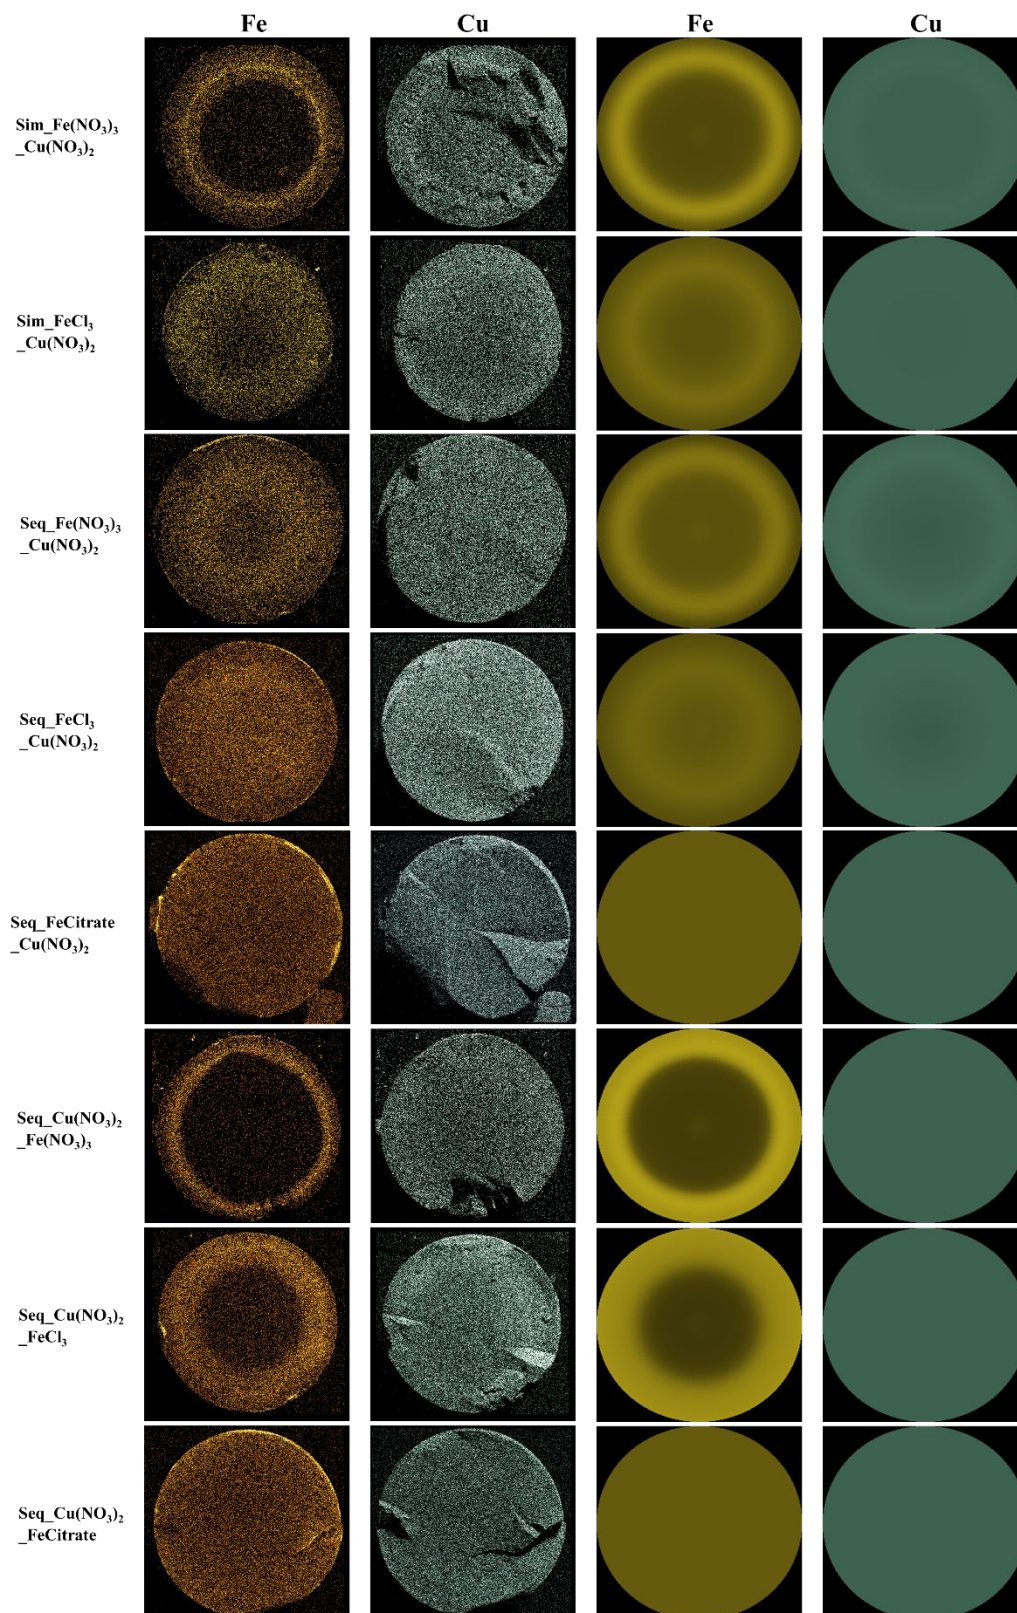



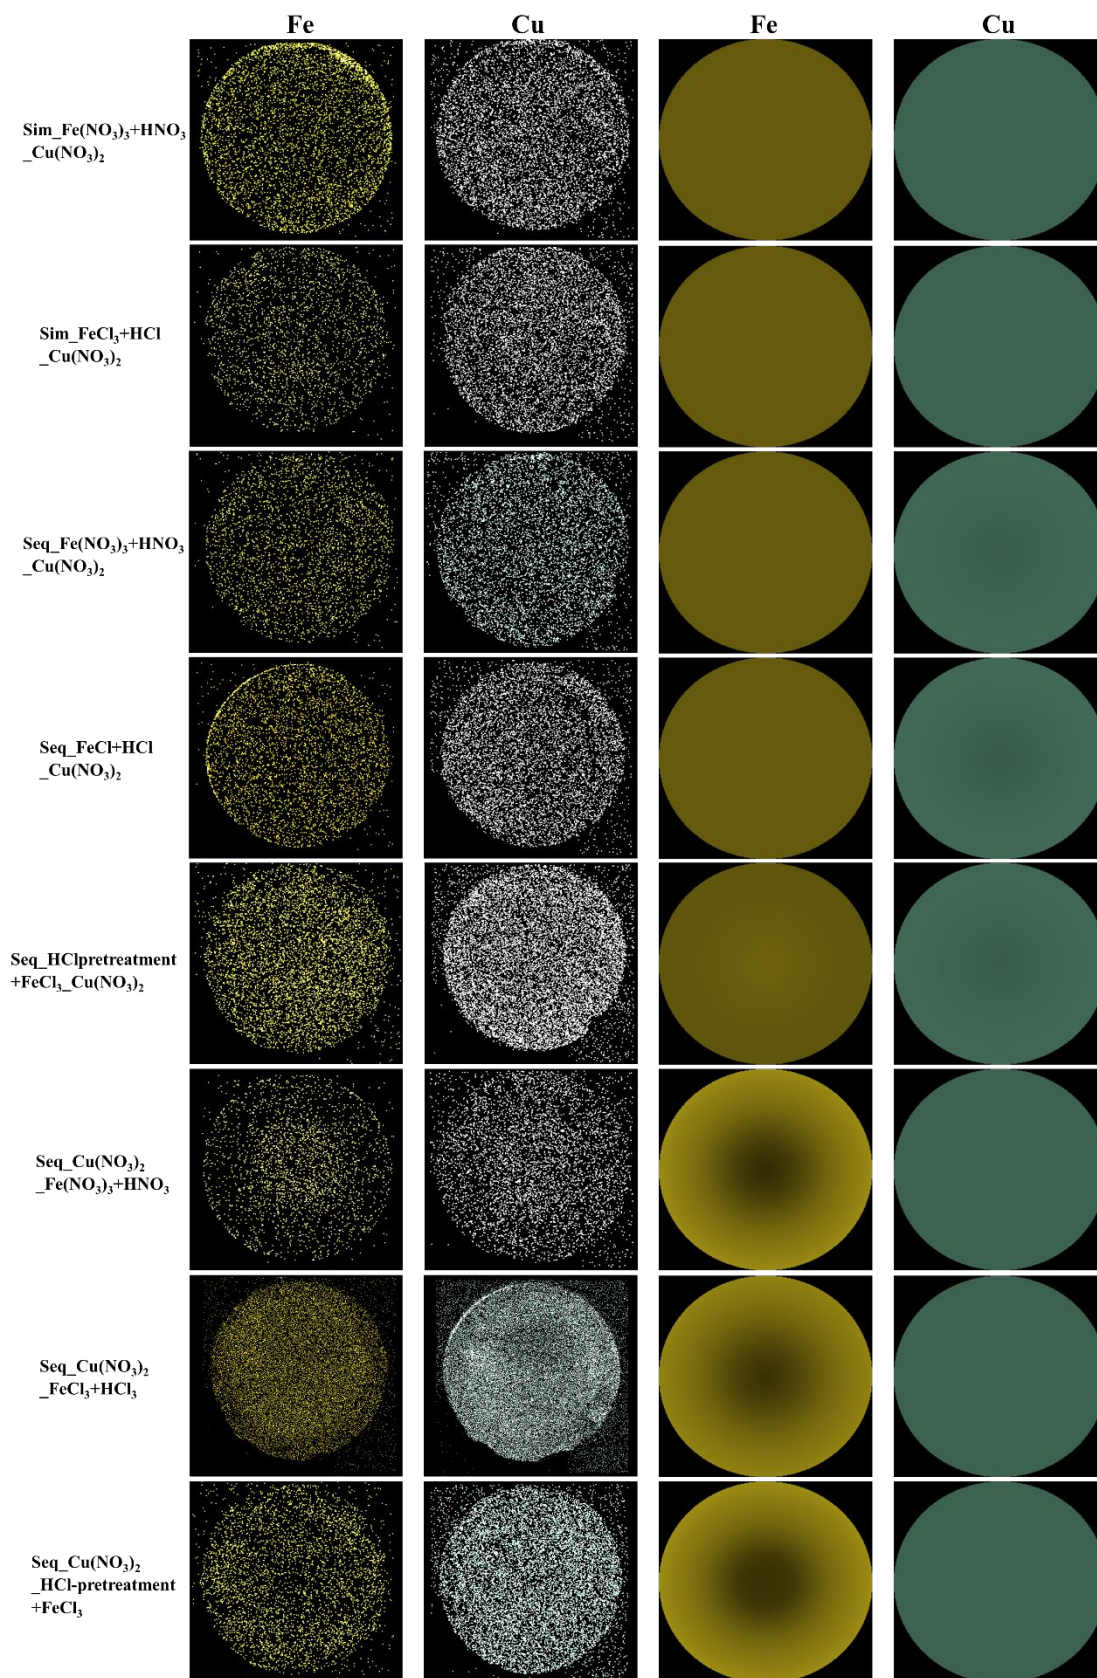

Figure SI-6: SEM-EDX mappings for each sample of the iron and copper distribution throughout an intersection of support microsphere (left), and the simulated iron and copper distributions predicted by the model (right)

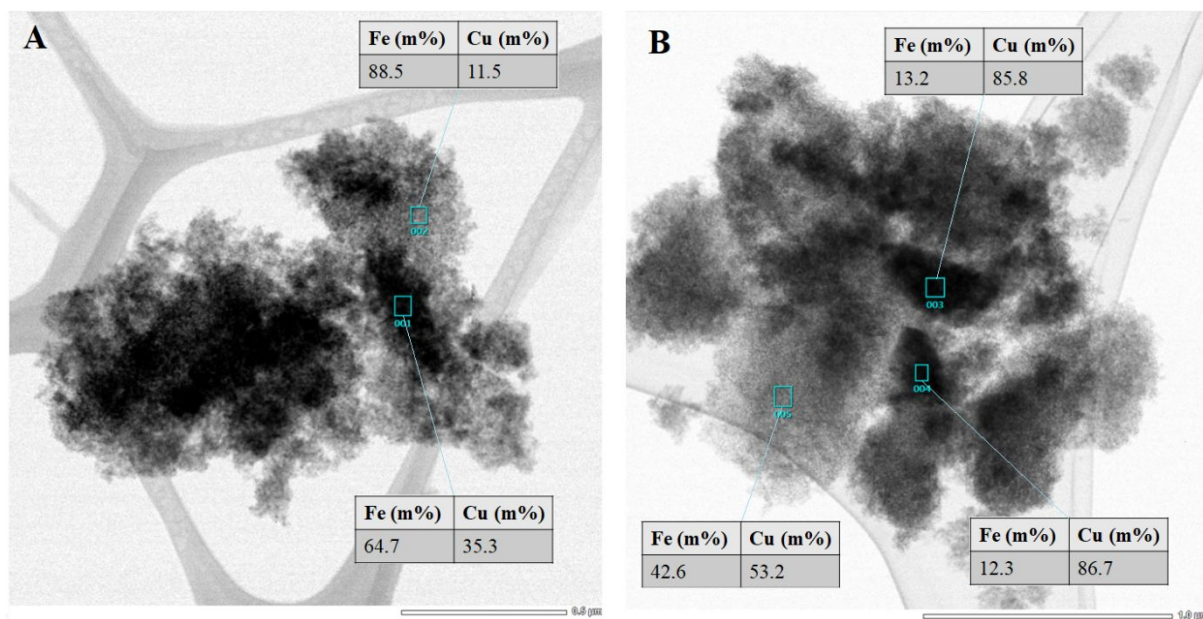

Figure SI-7: STEM images with Cu/Fe-EDX measurements of selected points, of alumina flakes of A.  $1\text{FeCl}_3+2\text{CuNO}_3$  and B.  $1\text{CuNO}_3+2\text{FeCl}_3$  materials. Darker areas correspond to alumina with more deposited metal and lighter areas correspond with alumina with little metal deposition
